# Supplementary material for: GRP per capita and hospital characteristics associated with intravenous tissue plasminogen activator adherence rate: evidence from the Chinese Stroke Center Alliance
Source: HighWire-hosted journal article supplement (doi:10.1136/svn-2020-000633), 2021-01-11
Supplement: svn-2020-000633supp001_data_supplement.pdf [file svn-2020-000633supp001_data_supplement.pdf]

## SUPPLEMENTAL MATERIAL

### **GRP Per Capita and Hospital Characteristics Associated with Intravenous Tissue Plasminogen Activator Adherence Rate: Evidence from the Chinese Stroke Center Alliance**

## Supplementary information

**Online supplemental table 1.** VIF table for multivariable regression variables

**Online supplemental table 2.** Patient Socioeconomic Status and Insurance Scheme by IV-rt PA quartile

**Online supplemental table 1.** VIF table for multivariable regression variables

| <b>VIF table</b>                                                                   |             |           |                                |
|------------------------------------------------------------------------------------|-------------|-----------|--------------------------------|
| <b>Parameter</b>                                                                   | <b>GVIF</b> | <b>df</b> | <b>GVIF<sup>1/(2*Df)</sup></b> |
| Per capita GRP (¥ 10,000)                                                          | 1.05        | 1         | 1.02                           |
| Stroke center type: (PSC as reference group)                                       | 1.15        | 1         | 1.07                           |
| Neurologists number                                                                | 1.15        | 1         | 1.07                           |
| Providing emergency service for neurological treatment (no [0] as reference group) | 1.01        | 1         | 1.00                           |
| Presence of ED (no [0] as reference group)                                         | 1.01        | 1         | 1.01                           |
| Cooperating with emergency center (no [0] as reference group)                      | 1.01        | 1         | 1.00                           |
| Year                                                                               | 1.05        | 4         | 1.01                           |

GVIF: generalized variance inflation factors.

Df: the degrees of freedom associated with the term.

GVIF<sup>1/(2\*Df)</sup> is presented here to adjust for the dimension of the confidence ellipsoid.

**Online supplemental table 2.** Patient Socioeconomic Status and Insurance Scheme by IV-rt PA quartile

|                                | TPA             |                 |                 |                 | P Value |
|--------------------------------|-----------------|-----------------|-----------------|-----------------|---------|
|                                | Quartile 1      | Quartile 2      | Quartile 3      | Quartile 4      |         |
|                                | < 5.7%          | 5.7%-16.9%      | 16.9%-33.3%     | > 33.3%         |         |
| <b>Socioeconomic status</b>    |                 |                 |                 |                 |         |
| Family Income, n (%)           |                 |                 |                 |                 |         |
| <= 1000                        | 3510<br>(12.9)  | 2962<br>(6.4)   | 2846<br>(6.7)   | 2508<br>(6.0)   | < 0.001 |
| 1001-5000                      | 9942<br>(36.5)  | 16558<br>(35.9) | 14050<br>(33.0) | 16613<br>(39.5) |         |
| >= 5000                        | 656<br>(2.4)    | 1487<br>(3.2)   | 2897<br>(6.8)   | 2305<br>(5.5)   |         |
| missing                        | 13153<br>(48.2) | 25071<br>(54.4) | 22773<br>(53.5) | 20672<br>(49.1) |         |
| <b>Education Level</b>         |                 |                 |                 |                 |         |
| Below Elementary               | 8822<br>(32.4)  | 11768<br>(25.5) | 11976<br>(28.1) | 13083<br>(31.1) | < 0.001 |
| High School                    | 7795<br>(28.6)  | 13284<br>(28.8) | 12979<br>(30.5) | 13859<br>(32.9) |         |
| College                        | 685<br>(2.5)    | 1430<br>(3.1)   | 1461<br>(3.4)   | 1570<br>(3.7)   |         |
| Unclear                        | 9959<br>(36.5)  | 19596<br>(42.5) | 16150<br>(37.9) | 13586<br>(32.3) |         |
| <b>Insurance Scheme, n (%)</b> |                 |                 |                 |                 |         |
| UEBMI                          | 6579            | 13706           | 13607           | 14762           | < 0.001 |

|              |        |        |        |        |
|--------------|--------|--------|--------|--------|
|              | (24.1) | (29.7) | (32.0) | (35.1) |
| URBMI        | 4662   | 8184   | 8009   | 8463   |
|              | (17.1) | (17.8) | (18.8) | (20.1) |
| NRCMS        | 13851  | 19288  | 15901  | 13474  |
|              | (50.8) | (41.9) | (37.4) | (32.0) |
| Self-payment | 1042   | 2596   | 3368   | 3873   |
|              | (3.8)  | (5.6)  | (7.9)  | (9.2)  |
| Other        | 1127   | 2304   | 1681   | 1526   |
|              | (4.1)  | (5.0)  | (3.9)  | (3.6)  |

UEBMI indicates urban employee basic medical insurance; URBMI, urban resident basic medical insurance; NRCMS, new rural cooperative medical scheme;
